Title : THE PHYSIOLOGY OF NARCOTIC-INDUCED RIGIDITY

Authors : J.L. Benthuyssen, M.D., N. Ty Smith, M.D., T.J. Sanford, Jr., M.D.,  
H. Dec Silver, R.N., N. Head

Affiliation : Department of Anesthesiology, University of California, San Diego  
and VA Medical Center, La Jolla, California

**Introduction.** Muscle rigidity is a familiar though poorly understood side effect of high-dose narcotic anesthesia. While compromised ventilation due to rigidity has been described, the hemodynamic, metabolic, electromyographic (EMG) and electroencephalographic (EEG) features have not been well documented. We investigated these characteristics of rigidity in patient volunteers during the induction of anesthesia with alfentanil (ALF).

**Methods.** With UCSD and VA human research committees' approval and patient written informed consent, 20 patients of ASA class 1-3, were randomly assigned sodium thiopental (STP) 4 mg/kg (10 patients) or alfentanil (ALF) 175 mcg/kg (10 patients) for induction. Arterial (MAP) and central venous (CVP) pressure and continuous pulse contour cardiac output were measured. Bilateral frontal EEG with on-line aperiodic analysis (Neurometrics), as well as 8 surface EMGs to assess rigidity of the neck, thorax and extremities were recorded. Oxygenation was assessed by transcutaneous O<sub>2</sub> and pulse oximetry. Arterial blood gases were sampled pre- and postinduction. Preinduction, an infusion of Ringers lactate 7 ml/kg was followed by five minutes of oxygenation at 8L/min. ALF or STP was administered over one minute. With ALF, rigidity was assessed in an apneic state for up to 5 minutes with the adequacy of oxygenation continuously assessed. Patients were then paralyzed, ventilated with 100% O<sub>2</sub> and maintained with inhalational anesthesia for surgery. Control patients received STP followed at one minute by relaxants to maintain apneic periods comparable to the alfentanil group. Statistical significance was assessed via analysis of variance and t tests.

**Results.** All patients receiving ALF manifested rigidity in every EMG, while there was no EMG activity with STP. With the onset of rigidity there was a significant fall in MAP ( $-10 \pm$  mmHg,  $P < 0.05$ ) which returned to baseline in 30 seconds. Cardiac index (CI) was unchanged during rigidity. Heart rate (HR) increased significantly after 1 1/2 minutes ( $8.0 \pm 3$  beats/m,  $P < 0.05$ ). CVP rose immediately with rigidity, peaking after 3 minutes ( $5.3 \pm 1.3$  mmHg,  $P < 0.02$ ). Patients who were rigid became significantly more acidotic due to greater increases in base deficit (BD) while the rise in PaCO<sub>2</sub> was not statistically different between groups (Table 1). PaO<sub>2</sub> decreased at a significantly greater rate in the patients who were rigid. There was no EEG evidence of seizure activity. The EEG demonstrated a greater depth of anesthesia in patients receiving ALF when compared with STP.

**Discussion.** Our results show the following: 1) Rigidity is present in all

muscle groups and its onset corresponds with unconsciousness. 2) ALF-induced rigidity is associated with an immediate rise in CVP. EMG evidence suggests that elevation of the intrathoracic pressure by the thoraco-abdominal musculature is a mechanism 3). CI was unchanged. Following the initial fall, MAP was unchanged during rigidity. Changes in pH and BD during ALF-induced rigidity are significantly greater than those occurring with in non-rigid apneic patients receiving STP. 4) Mitchell et al<sup>1</sup> described reflex increases in HR and MAP which accompany increased muscle tone and maintain O<sub>2</sub> delivery. Metabolic changes during rigidity may result from the absence of these cardiovascular reflexes. 5) No seizure activity was detected in the EEG during rigidity. An animal model of narcotic induced rigidity has been described<sup>2</sup> and used to define opiate receptors in the basal ganglia mediating rigidity<sup>3,4</sup>.

#### References

1. Mitchell JH, Schibye B, Payne FC, Saltin B: Response of arterial blood pressure to static exercise in relation to muscle mass force development, and electromyographic activity. *Circ Res Suppl* 1 48:70-75, 1981.
2. Wand P, Kuschinsky K, Sontag KH: Morphine induced muscular rigidity in rats. *Euro J Pharmac* 24:189-193, 1973.
3. Havemann U, Kuschinsky K: Further characterization of opioid receptors in the striatum mediating muscular rigidity in rats. *Nauyn-Schmiedeberg's Arch Pharmac* 317:321-325, 1981.
4. Havemann U, Kuschinsky K: Neurochemical aspects of the opioid-induced 'catatonia.' *Neurochem Inter* 4:199-215, 1982.

|                                        | ALFENTANIL              | THIOPENTAL          |
|----------------------------------------|-------------------------|---------------------|
| Duration of Apnea (min)                | 4.3 $\pm$ 0.2 +         | 3.8 $\pm$ 0.2       |
| PaO <sub>2</sub> mmHg Pre Induction    | 401.0 $\pm$ 19.0 +      | 425.0 $\pm$ 19.0    |
| $\Delta$ PaO <sub>2</sub> /dt mmHg/min | 51.0 $\pm$ 12.0 *       | 12.0 $\pm$ 6.0      |
| $\Delta$ pH/dt u/min                   | - 0.035 $\pm$ -0.002 ** | - 0.026 $\pm$ 0.002 |
| $\Delta$ CO <sub>2</sub> /dt mmHg/min  | 4.49 $\pm$ 0.36 +       | 4.41 $\pm$ 0.40     |
| $\Delta$ BE/dt u/min                   | - 0.72 $\pm$ 0.17 **    | - 0.14 $\pm$ 0.11   |

Table 3 - Comparative metabolism during apnea. (mean  $\pm$  SE)

+ NS  
\* P 0.01  
\*\* P < 0.01
